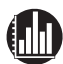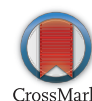

# Does Knowing One's Elevated Glycemic Status Make a Difference in Macronutrient Intake?

Diabetes Care 2014;37:3143–3149 | DOI: 10.2337/dc14-1342

Barbara H. Bardenheier,<sup>1</sup>  
Mary E. Cogswell,<sup>2</sup> Edward W. Gregg,<sup>1</sup>  
Desmond E. Williams,<sup>1</sup> Zefeng Zhang,<sup>2</sup>  
and Linda S. Geiss<sup>1</sup>

## OBJECTIVE

To determine whether macronutrient intake differs by awareness of glycemic status among people with diabetes and prediabetes.

## RESEARCH DESIGN AND METHODS

We used 24-h dietary recall and other data from 3,725 nonpregnant adults with diabetes or prediabetes aged  $\geq 20$  years from the morning fasting sample of the 2005–2010 National Health and Nutrition Examination Survey. Diabetes and prediabetes awareness were self-reported; those unaware of diabetes and prediabetes were defined by fasting plasma glucose (FPG)  $\geq 126$  mg/dL or HbA<sub>1c</sub>  $\geq 6.5\%$  and FPG 100–125 mg/dL or HbA<sub>1c</sub> of 5.7%–6.4%, respectively. Components of nutrient intake on a given day assessed were total calories, sugar, carbohydrates, fiber, protein, fat, and total cholesterol, stratified by sex and glycemic status awareness. Estimates of nutrient intake were adjusted for age, race/ethnicity, education level, BMI, smoking status, and family history of diabetes.

## RESULTS

Men with diagnosed diabetes consumed less sugar (mean 86.8 vs. 116.8 g) and carbohydrates (mean 235.0 vs. 262.1 g) and more protein (mean 92.3 vs. 89.7 g) than men with undiagnosed diabetes. Similarly, women with diagnosed diabetes consumed less sugar (mean 79.1 vs. 95.7 g) and more protein (mean 67.4 vs. 56.6 g) than women with undiagnosed diabetes. No significant differences in macronutrient intake were found by awareness of prediabetes. All participants, regardless of sex or glycemic status, consumed on average less than the American Diabetes Association recommendations for fiber intake (i.e., 14 g/1,000 kcal) and slightly more saturated fat than recommended ( $>10\%$  of total kcal).

## CONCLUSIONS

Screening and subsequent knowledge of glycemic status may favorably affect some dietary patterns for people with diabetes.

For many individuals with diabetes, the most challenging part of treatment is deciding what to eat (1). The most recent position statement on nutrition therapy for people with diabetes states that ideally, individuals should be referred to a registered dietitian (RD) soon after a diabetes diagnosis and then for ongoing follow-up or receive a referral to a comprehensive diabetes self-management program that includes instruction on nutrition therapy (1). However, national data indicate that only one-half of people with diabetes report ever receiving some type of diabetes education (2), and possibly even fewer see an RD. For those who are at high risk for

<sup>1</sup>Division of Diabetes Translation, National Center for Chronic Disease Prevention and Health Promotion, Centers for Disease Control and Prevention, Atlanta, GA

<sup>2</sup>Division for Heart Disease and Stroke Prevention, National Center for Chronic Disease Prevention and Health Promotion, Centers for Disease Control and Prevention, Atlanta, GA

Corresponding author: Barbara H. Bardenheier, bfb7@cdc.gov.

Received 27 May 2014 and accepted 14 August 2014.

This article contains Supplementary Data online at <http://care.diabetesjournals.org/lookup/suppl/doi:10.2337/dc14-1342/-/DC1>.

The findings and conclusions in this report are those of the authors and do not necessarily represent the official position of the Centers for Disease Control and Prevention.

© 2014 by the American Diabetes Association. Readers may use this article as long as the work is properly cited, the use is educational and not for profit, and the work is not altered.

developing type 2 diabetes, primary prevention strategies include use of nutrition therapy and public health interventions, which may include modest weight loss and moderate-intensity physical activity (3,4). The American Diabetes Association (ADA) recommends reduced caloric and fat intake as well as increased consumption of fiber for those who are at high risk for developing type 2 diabetes (e.g., those with prediabetes or who are overweight/obese). One study found that carbohydrate and protein intake among the U.S. population with self-reported diabetes were within ADA recommendations from 1988 to 2004 but that total fat, saturated fat, and total cholesterol intake was higher than recommended (5).

Lack of awareness about diabetes or prediabetes status may constitute an additional barrier to an optimal diet. However, whether awareness of diabetes and prediabetes status affects preventive behaviors is not clear. Although detection of diabetes is recommended, ~27% of all people with diabetes are undiagnosed. This is unfortunate because interventions to reduce the risk of developing complications are effective (6). Awareness of having prediabetes is even lower, with only 11% of those aged  $\geq 20$  years reporting prediabetes awareness during 2009–2010 (7). Trends in nutrient intake among patients with diabetes have been published (5), but we are not aware of studies examining nutrient intake among those with prediabetes and, in particular, comparing those who are aware of their glycemic status, diabetes, or prediabetes with those who are not. Furthermore, we are not aware of national studies assessing macronutrient intake among diabetic patients who had visited a dietitian. In this study, we examined 1) how nutrient intake differs by those who are aware of their glycemic status and by those who are not; 2) nutrient intake among those with diabetes (1) and prediabetes (3) in light of the current ADA recommendations; and 3) how nutrient intake differs among those with diagnosed diabetes who have visited a diabetes nurse educator, dietitian, or nutritionist as recommended by the ADA.

## RESEARCH DESIGN AND METHODS

### Survey Design and Population

As part of the National Health and Nutrition Examination Survey (NHANES)

2005–2010 of the National Center for Health Statistics, the Centers for Disease Control and Prevention collected data representative of the U.S. civilian non-institutionalized population (8). Survey participants were interviewed at home and invited to a mobile examination center to undergo various examinations and laboratory measurements. The examination component comprised medical, dental, and physiological measurements as well as laboratory tests administered by highly trained medical personnel. The response rates for those who participated in the examinations during 2005–2010 ranged from 75.4% to 77.4% (8). Participants selected to undergo tests requiring fasting between 8 and 24 h had appointments in the morning group. We restricted the analysis to the 7,638 persons in the morning fasting group; 6,749 fasted from 8 to  $< 24$  h before the examination and had valid values for both fasting plasma glucose (FPG) and HbA<sub>1c</sub> tests.

### Glycemic Status Definitions

Participants were asked whether they had ever been told by a physician or other health professional that they had diabetes (other than during pregnancy). Based on their answer, 812 in the morning fasting group were classified as having diagnosed diabetes, and 310 who reported they did not have diabetes but had FPG  $\geq 126$  mg/dL or HbA<sub>1c</sub>  $\geq 6.5\%$  (48 mmol/mol) were classified as having undiagnosed diabetes. The 2,603 participants without self-reported diabetes who had a FPG of 100–125 mg/dL or HbA<sub>1c</sub> of 5.7%–6.4% (39–47 mmol/mol) were classified as having prediabetes. Participants were classified as being aware of their prediabetes ( $n = 236$ ) if they 1) answered yes to the question, “Have you ever been told by a doctor that you have prediabetes, borderline diabetes, impaired fasting glucose, impaired glucose tolerance, or that your blood sugar is higher than normal but not high enough to be called diabetes or sugar diabetes” or 2) reported having prediabetes when asked whether they had diabetes. We excluded 3,024 participants who had normal glucose levels. The final sample size was 3,725 participants with diabetes or prediabetes (Supplementary Data).

### Assessment of Macronutrient Intake

Participants were asked to complete two nonconsecutive 24-h dietary recalls,

the first by a trained interviewer in the mobile examination center and the second by telephone 3–10 days later. The 24-h dietary recalls for NHANES 2005–2010 used the Automated Multiple-Pass Method (9), which increases the efficiency and accuracy of the 24-h recall by including standardized food-specific probing and follow-up questions and food models for estimating portion size. The 24-h recalls included weekdays and weekend days. Macronutrient values were assigned to foods by using the U.S. Department of Agriculture Food and Nutrient Database for Dietary Studies corresponding to each 2-year survey (10).

For the purpose of this analysis, dietary factors and macronutrients assessed were total caloric, total sugar, carbohydrate, fiber, protein, monounsaturated fat, polyunsaturated fat, saturated fat, total fat, and total cholesterol intake. Factors were also assessed as a percent of total caloric intake.

### Covariates

Covariates used to adjust estimates were age, race or ethnicity, education level, smoking status (e.g., current by self-report or cotinine levels  $> 10$  ng/mL, former or never by self-report), family history of diabetes, and BMI calculated from measured height and weight ( $\text{kg}/\text{m}^2$ ).

We also assessed the prevalence of participants with diagnosed diabetes who saw a diabetes nurse educator, dietitian, or nutritionist and examined differences in daily macronutrient intake by those who reported making such a visit within the past year,  $> 1$  year ago, and never, controlling for covariates mentioned previously and by sex. Among participants unaware of their diabetes and among those with prediabetes, we assessed the prevalence of blood glucose being tested in the past 3 years based on response to the question, “Have you had a blood test for high blood sugar or diabetes within the past 3 years?”

### Statistical Analysis

We used SAS version 9.3 software (SAS Institute, Inc., Cary, NC) to combine data from each survey. Sampling weights that account for unequal probabilities of selection resulting from sample design, nonresponse, and planned oversampling of certain subgroups were calculated to make weighted results representative of the U.S. population. We used SUDAAN

version 11.0.0 (Research Triangle Institute, Research Triangle Park, NC) with 6-year combined sampling weights for the fasting 2005–2010 subsample for linear regression (i.e., PROC REGRESS) to produce adjusted estimates stratified by sex. We used one day (the initial 24-h recall) to compare mean intakes in subgroups of the study population. Adjusted risks presented are predicted margins estimated from the regression analyses.

Two subanalyses were conducted and are presented in the Supplementary Data. First, we assessed macronutrient intake among participants with diagnosed diabetes by HbA<sub>1c</sub> level (<7% [53 mmol/mol]; 7%–7.9% [53–63 mmol/mol]; and ≥8% [64 mmol/mol]). Covariates in this analysis included age, sex, race, ethnicity, BMI, education level, duration of diabetes, self-reported use of diabetes medications, and smoking status, stratified by sex. Second, we assessed macronutrient intake by awareness of prediabetes stratified by

BMI, controlling for race/ethnicity, age, sex, education level, smoking status, and family history of diabetes. This analysis could not be performed by diabetes awareness because of the small sample size.

## RESULTS

### Macronutrient Intake by Diabetes Awareness

More women than men were aware of their diabetes (78.4% vs. 65.0%) (Table 1). Among those with diabetes, the prevalence of high cholesterol or being on medication was significantly higher for men aware than for men unaware of their diabetes (53.9% vs. 44.0%). The average BMI was significantly lower for women aware of their diabetes compared with their unaware counterparts (33.3 vs. 34.8 kg/m<sup>2</sup>).

On a given day, men aware of their diabetes compared with men who were unaware consumed, on average, less sugar (mean 86.8 vs. 116.8 g), fewer carbohydrates (mean 235.0 vs. 262.1 g), more

protein (mean 92.3 vs. 89.7 g), and significantly more protein as a percent of their daily total caloric intake (17.5% vs. 16.0%) (Table 2). On a given day, women aware of their diabetes compared with women who were unaware consumed less sugar (mean 79.1 vs. 95.7 g) while consuming more protein (mean 67.4 vs. 56.6 g) and protein as a percent of total caloric intake (17.6% vs. 15.6%). Additionally, the average consumption of total cholesterol on a given day was higher among women aware of their diabetes compared with women who were unaware (mean 250.4 vs. 187.0 mg). No statistically significant differences in daily total energy, fiber, or saturated fat intake were found by diabetes awareness status for men or women.

### Macronutrient Intake by Prediabetes Awareness

More women than men were aware of their prediabetes (10.6% vs. 7.6%) (Table 1). The prevalence of high cholesterol

**Table 1—Demographic and descriptive statistics among adults aged ≥20 years by awareness of glycemic status, NHANES 2005–2010**

|                                                                     | Diabetes    |            |             |            | Prediabetes |              |             |              |
|---------------------------------------------------------------------|-------------|------------|-------------|------------|-------------|--------------|-------------|--------------|
|                                                                     | Male        |            | Female      |            | Male        |              | Female      |              |
|                                                                     | Aware       | Unaware    | Aware       | Unaware    | Aware       | Unaware      | Aware       | Unaware      |
| Participants [n (%)]                                                | 400 (65.0)  | 192 (35.0) | 412 (78.4)  | 118 (21.6) | 115 (7.6)   | 1,308 (92.4) | 121 (10.6)  | 1,059 (89.4) |
| Age (years)                                                         | 57.8 ± 1.0  | 58.1 ± 1.2 | 60.8 ± 0.9  | 63.5 ± 1.4 | 57.2* ± 1.5 | 49.1 ± 0.7   | 56.8 ± 1.9  | 54.8 ± 0.7   |
| BMI (kg/m <sup>2</sup> )                                            | 31.8 ± 0.5  | 32.1 ± 0.7 | 33.3* ± 0.4 | 34.8 ± 0.6 | 30.5 ± 0.7  | 29.3 ± 0.2   | 33.0* ± 0.8 | 32.3 ± 0.4   |
| Race/ethnicity                                                      |             |            |             |            |             |              |             |              |
| Non-Hispanic white                                                  | 62.6 ± 3.9  | 69.2 ± 4.0 | 60.7 ± 4.1  | 63.2 ± 6.0 | 74.9 ± 4.7  | 69.8 ± 2.2   | 69.0 ± 5.1  | 70.5 ± 2.7   |
| Non-Hispanic black                                                  | 13.8 ± 2.4  | 13.2 ± 2.4 | 18.5 ± 2.4  | 18.7 ± 3.6 | 10.5 ± 2.3  | 10.8 ± 1.1   | 11.2 ± 2.7  | 13.0 ± 1.5   |
| Mexican American                                                    | 10.0 ± 1.8  | 11.3 ± 2.0 | 8.6 ± 1.7   | 9.1 ± 2.4  | 5.9 ± 1.9   | 9.6 ± 1.1    | 4.7 ± 1.3   | 7.7 ± 1.3    |
| Other                                                               | 13.6 ± 2.3  | 6.3 ± 1.8  | 12.1 ± 2.6  | —          | 8.7 ± 3.3   | 9.8 ± 1.2    | 15.1 ± 4.4  | 8.8 ± 1.4    |
| Smoking status                                                      |             |            |             |            |             |              |             |              |
| Current                                                             | 20.0 ± 2.5  | 21.8 ± 3.4 | 15.3 ± 2.5  | 17.2 ± 5.6 | 19.8 ± 4.6  | 26.5 ± 1.8   | 23.4 ± 4.9  | 20.3 ± 1.7   |
| Former                                                              | 48.5 ± 3.3  | 49.3 ± 3.9 | 45.0 ± 3.6  | 43.6 ± 6.2 | 37.6 ± 4.9  | 29.3 ± 1.9   | 31.4 ± 5.4  | 23.9 ± 2.1   |
| Never                                                               | 31.4 ± 2.6  | 29.0 ± 4.3 | 39.8 ± 2.9  | 39.2 ± 6.6 | 42.6 ± 4.9  | 44.2 ± 2.2   | 45.2 ± 5.6  | 55.8 ± 2.2   |
| Family history of diabetes                                          |             |            |             |            |             |              |             |              |
| Yes                                                                 | 66.6 ± 3.0  | 48.3 ± 4.2 | 71.4 ± 2.1  | 53.1 ± 6.8 | 47.7 ± 4.8  | 33.3 ± 1.1   | 53.7 ± 3.7  | 36.0 ± 1.4   |
| No                                                                  | 33.4 ± 3.0  | 51.7 ± 4.2 | 28.6 ± 2.1  | 46.9 ± 6.8 | 52.3 ± 4.8  | 66.7 ± 1.1   | 46.3 ± 3.7  | 64.0 ± 1.4   |
| Total cholesterol                                                   |             |            |             |            |             |              |             |              |
| <200 mg/dL                                                          | 36.2 ± 2.7  | 35.5 ± 3.6 | 32.1 ± 3.2  | 32.0 ± 5.1 | 35.1 ± 5.3  | 42.9 ± 1.7   | 25.5 ± 5.2  | 34.6 ± 1.9   |
| 200–239 mg/dL                                                       | 10.0 ± 2.4  | 20.5 ± 3.2 | 12.3 ± 2.1  | 18.6 ± 3.6 | 18.0 ± 3.7  | 29.1 ± 1.5   | 27.4 ± 5.6  | 27.5 ± 1.9   |
| ≥240 mg/dL or on medication                                         | 53.9* ± 3.3 | 44.0 ± 3.7 | 55.6 ± 3.8  | 49.4 ± 5.4 | 46.9* ± 4.5 | 28.1 ± 1.6   | 47.2 ± 6.1  | 37.9 ± 1.7   |
| Made a visit to diabetes nurse educator, dietitian, or nutritionist |             |            |             |            |             |              |             |              |
| Within the past year                                                | 39.5 ± 3.5  | n/a        | 34.7 ± 2.7  | n/a        | n/a         | n/a          | n/a         | n/a          |
| >1 year ago                                                         | 34.7 ± 3.8  | n/a        | 30.2 ± 3.6  | n/a        | n/a         | n/a          | n/a         | n/a          |
| Never made a visit                                                  | 25.8 ± 3.4  | n/a        | 35.1 ± 3.5  | n/a        | n/a         | n/a          | n/a         | n/a          |
| Had blood glucose tested within the past 3 years                    | n/a         | 68.2 ± 3.6 | n/a         | 65.9 ± 6.6 | 74.0* ± 5.5 | 45.8 ± 1.5   | 85.1* ± 4.2 | 51.5 ± 2.0   |

Data are mean ± SE unless otherwise indicated. n/a, not applicable because the question was not asked of the participants. \**P* < 0.05 comparing aware vs. unaware within sex.

or being on medication was significantly higher for men aware of their prediabetes than for men who were unaware (46.9% vs. 28.1%), and they were significantly older, on average, than those unaware of their status (57.2 vs. 49.1 years), but there was no difference in age by awareness among women. Among women with prediabetes, the average BMI of those aware of their prediabetes was significantly higher than among those who were unaware (33.4 vs. 32.3 kg/m<sup>2</sup>). No significant differences in daily energy intake or macronutrient intake were found among those with prediabetes by awareness status, regardless of sex (Table 3).

### Medical Care Visits

Although not statistically significant, more men aware of their diabetes than women saw a diabetes nurse educator, dietitian, or nutritionist within the past year (39.5% vs. 34.7%) or >1 year ago (34.7% vs. 30.2%), whereas more women than men never made such a visit (35.1% vs. 25.8%;  $P = 0.18$ ) (Table 1). Participants who reported visiting a dietitian or diabetes nurse educator within the past year consumed significantly fewer calories on a given day than those who reported a visit >1 year ago or never made such a visit (1,704 ± 67 vs. 1,986 ± 65 and 1,934 ± 62 kcal/day, respectively). Those who reported visiting a dietitian or diabetes nurse educator within the past year consumed significantly less protein, total fat, saturated fat, monounsaturated fat, and total cholesterol on a given day than those who reported a visit >1 year ago ( $P < 0.05$ ) (Table 4). Sixty-eight percent of men and 66% of women unaware of their diabetes reported having their blood glucose tested in the past 3 years, whereas 46% of men and 52% of women unaware of their prediabetes reported being tested.

### Subanalyses

Women with lower HbA<sub>1c</sub> (<7%) levels consumed, on average, significantly fewer total calories and carbohydrates and less protein, total fat, saturated fat, and monounsaturated fat than women with higher HbA<sub>1c</sub> levels ( $P < 0.05$ ) (Table 5). Men with lower HbA<sub>1c</sub> (<7%) levels consumed, on average, significantly more fiber while consuming less protein, total fat, and saturated fat than men with higher HbA<sub>1c</sub> levels ( $P < 0.05$ ). Those with a healthy

**Table 2—Macronutrient intake among adults aged ≥20 years by awareness of diabetes, NHANES 2005–2010**

|                         | Diabetes     |              |               |              |
|-------------------------|--------------|--------------|---------------|--------------|
|                         | Male         |              | Female        |              |
|                         | Aware        | Unaware      | Aware         | Unaware      |
| Participants [n (%)]    | 400 (65.0)   | 192 (35.0)   | 412 (78.4)    | 118 (21.6)   |
| Total energy (kcal)     | 2,167 ± 66   | 2,329 ± 94   | 1,621 ± 43    | 1,553 ± 61   |
| Fiber (g) <sup>a</sup>  | 8.4 ± 0.3    | 7.6 ± 0.3    | 9.0 ± 0.3     | 9.1 ± 0.6    |
| Sugar (g)               | 86.8* ± 4.4  | 116.8 ± 6.1  | 79.1* ± 3.8   | 95.7 ± 5.9   |
| Carbohydrate (g)        | 235.0* ± 7.8 | 262.1 ± 11.3 | 188.1 ± 5.9   | 193.8 ± 11.2 |
| % of total kcal         | 44.6 ± 0.8   | 46.1 ± 0.9   | 48.3 ± 0.8    | 51.0 ± 1.5   |
| Protein (g)             | 92.3* ± 3.4  | 89.7 ± 44.1  | 67.4* ± 1.8   | 56.6 ± 2.5   |
| % of total kcal         | 17.5* ± 0.3  | 16.0 ± 0.3   | 17.6* ± 0.5   | 15.6 ± 0.6   |
| Total fat (g)           | 89.0 ± 3.8   | 92.3 ± 5.8   | 62.7 ± 2.5    | 57.0 ± 2.8   |
| % of total kcal         | 36.4 ± 0.6   | 35.6 ± 0.9   | 34.9 ± 0.7    | 34.0 ± 1.2   |
| Saturated fat (g)       | 27.7 ± 1.3   | 31.3 ± 2.6   | 20.3 ± 1.0    | 19.5 ± 1.2   |
| % of total kcal         | 11.4 ± 0.3   | 11.9 ± 0.5   | 11.3 ± 0.4    | 11.6 ± 0.6   |
| Monounsaturated fat (g) | 33.5 ± 1.6   | 34.1 ± 2.2   | 23.3 ± 1.0    | 20.1 ± 1.1   |
| Polyunsaturated fat (g) | 20.0 ± 1.1   | 18.6 ± 1.2   | 13.6 ± 0.5    | 12.5 ± 0.8   |
| Total cholesterol (mg)  | 341.1 ± 18.3 | 339.8 ± 24.5 | 250.4* ± 11.8 | 187.0 ± 13.9 |

Data are mean ± SE unless otherwise indicated. Means are adjusted for race/ethnicity, age, BMI, education level, smoking status, and family history of diabetes, stratified by sex. <sup>a</sup>The ADA recommendation for diabetes management and diabetes prevention among people with prediabetes who are obese is 14 g/1,000 kcal daily. \* $P < 0.05$  comparing aware vs. unaware within sex.

weight (BMI 18.6–24.9 kg/m<sup>2</sup>) who were aware of their prediabetes consumed significantly less protein as well as saturated fat as a total percent of their caloric intake on a given day than those unaware of their prediabetes ( $P < 0.05$ ) (Table 6).

### CONCLUSIONS

This analysis of nationally representative survey data indicates that awareness of diabetes status is associated with some aspects of macronutrient diet composition measured by 24-h

**Table 3—Macronutrient intake among adults aged ≥20 years by prediabetes awareness, NHANES 2005–2010**

|                         | Prediabetes  |              |              |              |
|-------------------------|--------------|--------------|--------------|--------------|
|                         | Male         |              | Female       |              |
|                         | Aware        | Unaware      | Aware        | Unaware      |
| Participants [n (%)]    | 115 (7.6)    | 1,308 (92.4) | 121 (10.6*)  | 1,059 (89.4) |
| Total energy (kcal)     | 2,659 ± 103  | 2,635 ± 30   | 1,814 ± 72   | 1,803 ± 18   |
| Fiber (g) <sup>a</sup>  | 7.6 ± 0.3    | 7.1 ± 0.1    | 8.4 ± 0.4    | 8.4 ± 0.1    |
| Sugar (g)               | 151.5 ± 12.2 | 139.2 ± 3.2  | 109.6 ± 6.1  | 100.8 ± 1.5  |
| Carbohydrate (g)        | 313.9 ± 17.6 | 308.1 ± 4.6  | 235.4 ± 9.6  | 222.3 ± 2.6  |
| % of total kcal         | 48.1 ± 1.4   | 47.9 ± 0.4   | 50.6 ± 1.6   | 50.2 ± 0.3   |
| Protein (g)             | 100.9 ± 4.0  | 101.6 ± 1.6  | 68.1 ± 3.5   | 67.7 ± 0.8   |
| % of total kcal         | 15.7 ± 0.7   | 15.9 ± 0.2   | 15.2 ± 0.5   | 15.4 ± 0.1   |
| Total fat (g)           | 99.6 ± 3.9   | 98.3 ± 1.7   | 70.0 ± 4.1   | 67.8 ± 1.0   |
| % of total kcal         | 33.6 ± 1.1   | 33.5 ± 0.3   | 33.8 ± 1.2   | 33.3 ± 0.2   |
| Saturated fat (g)       | 32.7 ± 1.8   | 32.5 ± 0.6   | 22.2 ± 1.4   | 22.3 ± 0.4   |
| % of total kcal         | 10.8 ± 0.5   | 11.0 ± 0.1   | 10.7 ± 0.4   | 10.9 ± 0.1   |
| Monounsaturated fat (g) | 37.1 ± 1.3   | 36.5 ± 0.6   | 25.6 ± 1.4   | 24.4 ± 0.4   |
| Polyunsaturated fat (g) | 20.8 ± 1.2   | 20.6 ± 0.4   | 16.5 ± 1.4   | 15.2 ± 0.2   |
| Total cholesterol (mg)  | 373.5 ± 23.1 | 364.3 ± 8.3  | 212.4 ± 18.0 | 232.1 ± 4.5  |

Data are mean ± SE unless otherwise indicated. Means are adjusted for race/ethnicity, age, BMI, education level, smoking status, and family history of diabetes, stratified by sex. <sup>a</sup>The ADA recommendation for diabetes management and diabetes prevention among people with prediabetes who are obese is 14 g/1,000 kcal daily. \* $P < 0.05$  comparing aware vs. unaware within sex.



**Table 4—Macronutrient intake among adults aged ≥20 years with diagnosed diabetes by visits to a dietitian or diabetes nurse educator, NHANES 2005–2010**

|                         | Visited a dietitian or diabetes nurse educator |              |              |
|-------------------------|------------------------------------------------|--------------|--------------|
|                         | Within past year                               | >1 year ago  | Never        |
| Participants [n (%)]    | 297 (37.0)                                     | 237 (32.3)   | 272 (30.7)   |
| Total energy (kcal)     | 1,704* ± 67                                    | 1,986 ± 65   | 1,934 ± 62   |
| Fiber (g) <sup>a</sup>  | 9.0 ± 0.4                                      | 8.6 ± 0.3    | 8.5 ± 0.4    |
| Sugar (g)               | 77.0 ± 5.9                                     | 85.3 ± 4.3   | 85.7 ± 5.7   |
| Carbohydrate (g)        | 198.9 ± 9.8                                    | 213.2 ± 7.3  | 216.6 ± 9.7  |
| % of total kcal         | 47.5 ± 1.1                                     | 44.3 ± 0.9   | 47.6 ± 1.4   |
| Protein (g)             | 73.3** ± 3.6                                   | 86.0 ± 4.2   | 78.6 ± 3.5   |
| % of total kcal         | 18.1 ± 0.5                                     | 17.6 ± 0.6   | 17.0 ± 0.5   |
| Total fat (g)           | 66.8** ± 3.8                                   | 83.2 ± 4.2   | 75.0 ± 3.8   |
| % of total kcal         | 34.7 ± 0.8                                     | 37.0 ± 0.8   | 35.0 ± 1.1   |
| Saturated fat (g)       | 20.5** ± 1.2                                   | 26.9 ± 1.7   | 24.2 ± 1.5   |
| % of total kcal         | 10.8 ± 0.3                                     | 12.0 ± 0.5   | 11.3 ± 0.5   |
| Monounsaturated fat (g) | 29.6** ± 1.5                                   | 31.8 ± 1.6   | 28.0 ± 1.5   |
| Polyunsaturated fat (g) | 15.8 ± 1.0                                     | 17.2 ± 1.2   | 16.2 ± 0.8   |
| Total cholesterol (mg)  | 259.9** ± 16.7                                 | 326.1 ± 16.5 | 293.8 ± 21.1 |

Data are mean ± SE unless otherwise indicated. Means are adjusted for race/ethnicity, age, sex, BMI, education level, smoking status, and family history of diabetes. <sup>a</sup>The ADA recommendation for diabetes management and diabetes prevention among people with prediabetes who are obese is 14 g/1,000 kcal daily. \**P* < 0.05 compared with >1 year ago and never made a visit. \*\**P* < 0.05 compared with >1 year ago.

dietary recall. On a given day, people with diagnosed diabetes consume less sugar and fewer total carbohydrates (among men only) than those with undiagnosed diabetes, which may be indicative of healthy behavior modification because of the potential impact of carbohydrate intake on glycemic management and postprandial glucose levels

(11). However, regardless of glycemic status or sex, the average consumption of fiber and saturated fat were not within ADA recommendations. There were no significant differences in total fat intake on a given day by awareness of glycemic status, but women aware of their diabetes consumed significantly more total cholesterol than those

unaware. Those aware of their diabetes consumed significantly more protein on a given day than those unaware. Additionally, those aware of their diabetes who visited a diabetes nurse educator or dietitian in the past year consumed significantly fewer calories and less protein, total fat, saturated fat, monounsaturated fat, and total cholesterol on a given day than those who had not made such a visit. However, in general, awareness of prediabetes was not associated with macronutrient intake. Finally, we found in a subanalysis that lower consumption of calories on a given day was associated with lower levels of HbA<sub>1c</sub> among participants aware of their diabetes.

On a given day, the findings show that a lower intake of sugar and carbohydrates combined with higher intake of protein among those aware of their diabetes may be one consistent pattern with the current ADA recommendations. Because evidence is inconclusive for an ideal amount of carbohydrate intake for people with diabetes, the ADA does not recommend a specific limit but states that “the amount of carbohydrates and available insulin may be the most important factor influencing glycemic response after eating and should be considered when developing the eating plan” (1). A contributing factor to the difference in sugar consumption may

**Table 5—Macronutrient intake among adults aged ≥20 years with diagnosed diabetes by HbA<sub>1c</sub> level, NHANES 2005–2010**

|                         | Diagnosed diabetes     |                         |                        |                        |                         |                        |
|-------------------------|------------------------|-------------------------|------------------------|------------------------|-------------------------|------------------------|
|                         | Male                   |                         |                        | Female                 |                         |                        |
|                         | HbA <sub>1c</sub> <7.0 | HbA <sub>1c</sub> 7–7.9 | HbA <sub>1c</sub> ≥8.0 | HbA <sub>1c</sub> <7.0 | HbA <sub>1c</sub> 7–7.9 | HbA <sub>1c</sub> ≥8.0 |
| Participants [n (%)]    | 198 (50.4)             | 81 (22.5)               | 120 (27.1)             | 214 (55.7)             | 102 (25.6)              | 92 (18.6)              |
| Total energy (kcal)     | 2,064 ± 110            | 2,174 ± 106             | 2,309 ± 89             | 1,498 ± 60*            | 1,771 ± 78              | 1,701 ± 148            |
| Fiber (g) <sup>a</sup>  | 9.1 ± 0.4*             | 7.5 ± 0.5               | 7.7 ± 0.4              | 8.7 ± 0.4              | 9.2 ± 0.5               | 9.7 ± 0.5              |
| Sugar (g)               | 88.0 ± 6.5             | 79.7 ± 7.4              | 86.2 ± 8.3             | 72.6 ± 4.6             | 89.1 ± 7.6              | 80.4 ± 7.0             |
| Carbohydrate (g)        | 225.8 ± 11.9           | 232.0 ± 11.7            | 249.1 ± 11.4           | 173.5 ± 7.3*           | 208.1 ± 13.1            | 190.3 ± 17.4           |
| % of total kcal         | 46.8 ± 1.1*            | 43.6 ± 1.3              | 42.4 ± 1.3             | 48.7 ± 1.1             | 48.1 ± 1.5              | 47.1 ± 1.9             |
| Protein (g)             | 83.1 ± 5.1*            | 95.1 ± 7.6              | 103.4 ± 4.9            | 60.3 ± 2.1*            | 74.6 ± 4.5              | 76.2 ± 7.9             |
| % of total kcal         | 17.3 ± 0.6             | 17.4 ± 0.6              | 17.9 ± 0.7             | 17.8 ± 0.7             | 17.5 ± 0.8              | 19.0 ± 1.1             |
| Total fat (g)           | 75.9 ± 5.2*            | 93.9 ± 6.0              | 100.6 ± 5.4            | 57.3 ± 3.2*            | 67.1 ± 3.9              | 65.6 ± 8.6             |
| % of total kcal         | 34.3 ± 1.0*            | 37.5 ± 1.1              | 37.7 ± 0.9             | 34.5 ± 0.9             | 34.7 ± 1.3              | 34.5 ± 1.3             |
| Saturated fat (g)       | 24.4 ± 1.7*            | 29.0 ± 1.8              | 30.9 ± 1.8             | 18.3 ± 1.3*            | 21.7 ± 1.3              | 22.1 ± 3.5             |
| % of total kcal         | 11.0 ± 0.3             | 11.8 ± 0.5              | 11.5 ± 0.5             | 11.1 ± 0.4             | 11.3 ± 0.6              | 11.2 ± 0.7             |
| Monounsaturated fat (g) | 27.7 ± 2.0             | 35.7 ± 2.5              | 39.1 ± 2.4             | 21.1 ± 1.2*            | 25.1 ± 1.7              | 24.5 ± 3.3             |
| Polyunsaturated fat (g) | 17.3 ± 1.4             | 21.0 ± 1.9              | 21.7 ± 1.9             | 12.8 ± 0.8             | 14.3 ± 1.1              | 13.0 ± 1.3             |
| Total cholesterol (mg)  | 313.2 ± 24.4           | 372.4 ± 40.2            | 354.9 ± 28.1           | 227.3 ± 15.8           | 251.7 ± 21.7            | 291.4 ± 31.4           |

Data are mean ± SE unless otherwise indicated. Means are adjusted for race/ethnicity, age, BMI, education level, duration of diabetes, self-reported use of diabetes medications, and smoking status, stratified by sex. <sup>a</sup>The ADA recommendation for diabetes management and diabetes prevention among people with prediabetes who are obese is 14 g/1,000 kcal daily. \**P* < 0.05 comparing HbA<sub>1c</sub> levels within sex.

**Table 6—Macronutrient intake among adults aged  $\geq 20$  years by prediabetes awareness and BMI, NHANES 2005–2010**

|                         | Prediabetes                                          |                  |                                                  |                  |                                               |                 |
|-------------------------|------------------------------------------------------|------------------|--------------------------------------------------|------------------|-----------------------------------------------|-----------------|
|                         | Healthy weight<br>(BMI 18.6–24.9 kg/m <sup>2</sup> ) |                  | Overweight<br>(BMI 25.0–29.9 kg/m <sup>2</sup> ) |                  | Obese<br>(BMI $\geq 30.0$ kg/m <sup>2</sup> ) |                 |
|                         | Aware                                                | Unaware          | Aware                                            | Unaware          | Aware                                         | Unaware         |
| Participants [n (%)]    | 30 (4.7)                                             | 520 (95.3)       | 82 (9.5)                                         | 850 (90.5)       | 119 (10.8)                                    | 934 (89.2)      |
| Total energy (kcal)     | 2,103 $\pm$ 245                                      | 2,119 $\pm$ 64   | 2,180 $\pm$ 116                                  | 2,261 $\pm$ 52   | 2,260 $\pm$ 95                                | 2,156 $\pm$ 38  |
| Fiber (g) <sup>a</sup>  | 8.7 $\pm$ 1.4                                        | 8.3 $\pm$ 0.3    | 8.4 $\pm$ 0.6                                    | 7.7 $\pm$ 0.2    | 8.1 $\pm$ 0.4                                 | 7.4 $\pm$ 0.2   |
| Sugar (g)               | 147.4 $\pm$ 18.7                                     | 113.2 $\pm$ 4.6  | 111.3 $\pm$ 9.8                                  | 131.2 $\pm$ 5.1  | 130.1 $\pm$ 8.4                               | 115.4 $\pm$ 2.6 |
| Carbohydrate (g)        | 291.7 $\pm$ 32.0                                     | 257.8 $\pm$ 9.8  | 251.1 $\pm$ 17.1                                 | 277.2 $\pm$ 8.3  | 276.9 $\pm$ 13.1                              | 253.8 $\pm$ 5.3 |
| % of total kcal         | 55.1 $\pm$ 2.9                                       | 49.7 $\pm$ 0.9   | 47.8 $\pm$ 1.5                                   | 49.3 $\pm$ 0.5   | 49.0 $\pm$ 1.0                                | 47.9 $\pm$ 0.5  |
| Protein (g)             | 68.7 $\pm$ 13.6                                      | 80.0 $\pm$ 2.9   | 82.1 $\pm$ 5.2                                   | 86.4 $\pm$ 2.5   | 86.8 $\pm$ 3.6                                | 84.9 $\pm$ 2.0  |
| % of total kcal         | 12.6 $\pm$ 1.1*                                      | 15.5 $\pm$ 0.3   | 15.4 $\pm$ 0.6                                   | 15.4 $\pm$ 0.2   | 15.6 $\pm$ 0.4                                | 16.0 $\pm$ 0.2  |
| Total fat (g)           | 74.8 $\pm$ 9.9                                       | 78.9 $\pm$ 3.2   | 82.0 $\pm$ 6.0                                   | 85.6 $\pm$ 2.4   | 91.8 $\pm$ 4.6                                | 84.6 $\pm$ 1.9  |
| % of total kcal         | 31.4 $\pm$ 1.2                                       | 32.5 $\pm$ 0.6   | 33.6 $\pm$ 1.4                                   | 33.4 $\pm$ 0.4   | 35.9 $\pm$ 0.9                                | 34.8 $\pm$ 0.4  |
| Saturated fat (g)       | 22.0 $\pm$ 3.4                                       | 25.8 $\pm$ 1.2   | 26.0 $\pm$ 2.3                                   | 28.6 $\pm$ 1.0   | 30.1 $\pm$ 1.7                                | 27.8 $\pm$ 0.7  |
| % of total kcal         | 9.2 $\pm$ 0.6*                                       | 10.4 $\pm$ 0.2   | 10.5 $\pm$ 0.5                                   | 11.0 $\pm$ 0.2   | 12.0 $\pm$ 0.5                                | 11.4 $\pm$ 0.2  |
| Monounsaturated fat (g) | 28.5 $\pm$ 3.9                                       | 29.0 $\pm$ 1.3   | 30.6 $\pm$ 2.3                                   | 31.4 $\pm$ 0.9   | 33.4 $\pm$ 1.7                                | 30.9 $\pm$ 0.7  |
| Polyunsaturated fat (g) | 18.6 $\pm$ 2.4                                       | 17.1 $\pm$ 0.7   | 17.9 $\pm$ 1.4                                   | 18.1 $\pm$ 0.4   | 20.4 $\pm$ 2.0                                | 18.3 $\pm$ 0.5  |
| Total cholesterol (mg)  | 214.7 $\pm$ 30.3                                     | 277.7 $\pm$ 15.1 | 316.2 $\pm$ 35.1                                 | 317.2 $\pm$ 13.2 | 311.9 $\pm$ 21.3                              | 317.9 $\pm$ 9.1 |

Data are mean  $\pm$  SE unless otherwise indicated. Means are adjusted for race/ethnicity, age, sex, education level, smoking status, and family history of diabetes, stratified by BMI. <sup>a</sup>The ADA recommendation for diabetes management and diabetes prevention among people with prediabetes who are obese is 14 g/1,000 kcal daily. \* $P < 0.05$  comparing aware vs. unaware within BMI.

be that adults with undiagnosed diabetes consume more sugar from sugar-sweetened beverages than adults with diagnosed diabetes (12).

Because there is limited research regarding optimal dietary cholesterol intake in people with diabetes and because cardiovascular disease is a common cause of death among individuals with diabetes (13), the ADA recommends the same nutrition guidelines as for the general population to manage cardiovascular disease risk factors, including reducing saturated fat intake to 10% of calories and aiming for  $<300$  mg dietary cholesterol per day. Overall, participants with diabetes and prediabetes consumed slightly higher levels of saturated fat on a given day than recommended, and men consumed more cholesterol than recommended, regardless of glycemic status. Furthermore, men aware of their glycemic status were significantly more likely to have high cholesterol or to be on medication than their unaware counterparts. One unexpected finding was that women aware of their diabetes status consumed significantly more cholesterol on a given day than those unaware. One reason may be that these women were more focused on limiting carbohydrates, specifically sugars, and controlling the amount of fat they consumed

without paying as much attention to the type of fat. This explanation may also account for why they did not consume less saturated fat or consume more mono- and polyunsaturated fat on a given day than those unaware of their diabetes status. Although average consumption of cholesterol on a given day was higher among women aware of their diabetes or prediabetes, the levels were still well within the recommended limits. Furthermore, the proportion of women aware of their diabetes taking antihypercholesterolemia medication or with high total serum blood cholesterol levels was not significantly higher than their unaware counterparts.

For prevention of diabetes among people with prediabetes, the ADA recommends physical activity and individualized medical nutrition therapy, preferably from an RD familiar with the components of diabetes medical nutrition therapy (3). We found that among participants with diagnosed diabetes who visited a dietitian within the past year, the average consumption of total calories on a given day was lower and that total fat, saturated fat, and total cholesterol intake was lower than among those who had not made such a visit. This finding suggests that at least one visit a year to a dietitian for diabetic patients may be beneficial.

One study found that a physician's referral to a dietitian is a strong predictor of making such a visit among diabetic patients (14). Consequently, because the proportion aware of their prediabetes status was quite low ( $\leq 11\%$ ) and those with prediabetes, on average, were obese, diabetes screening and primary prevention counseling could be improved because only one-half of the present study participants with prediabetes reported having been tested for diabetes in the past 3 years.

This study had strengths and potential limitations. Strengths of the analysis include the large nationally representative sample. A primary limitation is the cross-sectional design; we could not control for duration of diabetes because we did not know the duration of diabetes for the undiagnosed group. Duration of disease may affect behavior (15). Additionally, nutrient intake data were based on self-report, and although studies have shown that the dietary collection methods adopted after NHANES III accurately report energy intake in normal-weight subjects (9,16), people who are overweight, obese, or weight conscious may underreport their energy intake (9,17). Moreover, we do not know whether adults with diabetes may differentially report dietary intake, and we are not aware of a validation

analysis to know how sensitive or specific the question we used to identify a previous report of prediabetes was.

The present results suggest that knowledge of glycemic status may favorably affect some dietary patterns for patients with diabetes, but a similar benefit was not observed with prediabetes awareness. Patients with diagnosed diabetes may be more concerned about their illness and, thus, more likely to receive education (2) and support from dietitians (18), but knowledge of prediabetes status does not elicit the same kind of attention. More-intensive identification and referral of adults with prediabetes to primary prevention that addresses and promotes changes to dietary habits and consumption may be beneficial. Additionally, nutrition recommendations for patients with diabetes have changed over time (19), with new recommendations sometimes contradicting previous recommendations (20). Thus, the promotion of ongoing education and nutrition therapy for patients with prevalent diabetes, as well as for those who have received a new diagnosis, may help to improve dietary modification and glycemic management.

**Acknowledgments.** The authors thank Jane Zanca, Centers for Disease Control and Prevention, for editorial assistance with the manuscript.

**Duality of Interest.** No potential conflicts of interest relevant to this article were reported.

**Author Contributions.** B.H.B. researched data; contributed to the data analyses, discussion, and writing of the manuscript; and reviewed and edited the manuscript. M.E.C. and Z.Z. researched data, contributed to the data analyses and discussion, and reviewed and edited the manuscript. E.W.G., D.E.W., and L.S.G.

contributed to the discussion and writing of the manuscript and reviewed and edited the manuscript. B.H.B. is the guarantor of this work and, as such, had full access to all the data in the study and takes responsibility for the integrity of the data and the accuracy of the data analysis.

**Prior Presentation.** Parts of this study were presented in poster form at the 74th Scientific Sessions of the American Diabetes Association, San Francisco, CA, 13–17 June 2014.

## References

1. Evert AB, Boucher JL, Cypress M, et al.; American Diabetes Association. Nutrition therapy recommendations for the management of adults with diabetes. *Diabetes Care* 2013;36:3821–3842
2. Ali MK, Bullard KM, Saaddine JB, Cowie CC, Imperatore G, Gregg EW. Achievement of goals in U.S. diabetes care, 1999–2010. *N Engl J Med* 2013;368:1613–1624
3. Bantle JP, Wylie-Rosett J, Albright AL, et al.; American Diabetes Association. Nutrition recommendations and interventions for diabetes: a position statement of the American Diabetes Association. *Diabetes Care* 2008;31(Suppl. 1):S61–S78
4. Knowler WC, Barrett-Connor E, Fowler SE, et al.; Diabetes Prevention Program Research Group. Reduction in the incidence of type 2 diabetes with lifestyle intervention or metformin. *N Engl J Med* 2002;346:393–403
5. Oza-Frank R, Cheng YJ, Narayan KM, Gregg EW. Trends in nutrient intake among adults with diabetes in the United States: 1988–2004. *J Am Diet Assoc* 2009;109:1173–1178
6. Centers for Disease Control and Prevention. *National Diabetes Fact Sheet: National Estimates and General Information on Diabetes and Prediabetes in the United States, 2011*. Atlanta, GA, U.S. Department of Health and Human Services, Centers for Disease Control and Prevention, 2011
7. Centers for Disease Control and Prevention (CDC). Awareness of prediabetes—United States, 2005–2010. *MMWR Morb Mortal Wkly Rep* 2013;62:209–212
8. Center for Disease Control and Prevention. National Health and Nutrition Examination Survey [Internet], 2012. Available from <http://www.cdc.gov/nchs/nhanes.htm>. Accessed 5 September 2012
9. Moshfegh AJ, Rhodes DG, Baer DJ, et al. The US Department of Agriculture Automated Multiple-Pass Method reduces bias in the collection of energy intakes. *Am J Clin Nutr* 2008;88:324–332
10. U.S. Department of Agriculture; Agriculture Research Service. Food and Nutrient Database for Dietary Studies [Internet], 2014. Available from <http://www.ars.usda.gov/News/docs.htm?docid=12089>. Accessed 10 January 2014
11. Franz MJ, Powers MA, Leontos C, et al. The evidence for medical nutrition therapy for type 1 and type 2 diabetes in adults. *J Am Diet Assoc* 2010;110:1852–1889
12. Bleich SN, Wang YC. Consumption of sugar-sweetened beverages among adults with type 2 diabetes. *Diabetes Care* 2011;34:551–555
13. Kannel WB, McGee DL. Diabetes and cardiovascular disease. The Framingham study. *JAMA* 1979;241:2035–2038
14. Arnold MS, Stepien CJ, Hess GE, Hiss RG. Guidelines vs practice in the delivery of diabetes nutrition care. *J Am Diet Assoc* 1993;93:34–39
15. Nothwehr F, Stump T. Health-promoting behaviors among adults with type 2 diabetes: findings from the Health and Retirement Study. *Prev Med* 2000;30:407–414
16. Blanton CA, Moshfegh AJ, Baer DJ, Kretsch MJ. The USDA Automated Multiple-Pass Method accurately estimates group total energy and nutrient intake. *J Nutr* 2006;136:2594–2599
17. Nielsen SJ, Popkin BM. Patterns and trends in food portion sizes, 1977–1998. *JAMA* 2003;289:450–453
18. Morris S, Wylie-Rosett J. Medical nutrition therapy: a key to diabetes management and prevention. *Clin Diabetes* 2010;28:12–18
19. Gillespie SJ. A carbohydrate is a carbohydrate is a carbohydrate: is the ban on sugar really lifted? *Diabetes Educ* 1996;22:449, 451–452, 457
20. Franz MJ, Alison AB (Eds). *American Diabetes Association Guide to Nutrition Therapy for Diabetes*. 2nd ed. Alexandria, VA, American Diabetes Association, 2012
